1 **Title:** The developmental and genetic architecture of the sexually selected male ornament of swordtails

2

3 **Authors:** Manfred Schartl<sup>1,2</sup>, Susanne Kneitz<sup>3</sup>, Jenny Ormanns<sup>3</sup>, Cornelia Schmidt<sup>3</sup>, Jennifer L  
4 Anderson<sup>4</sup>, Angel Amores<sup>5</sup>, Julian Catchen<sup>6</sup>, Catherine Wilson<sup>5</sup>, Dietmar Geiger<sup>7</sup>, Kang Du<sup>1,2</sup>, Mateo  
5 Garcia-Olazábal<sup>8</sup>, Sudha Sudaram<sup>9</sup>, Christoph Winkler<sup>9</sup>, Rainer Hedrich<sup>7</sup>, Wesley C Warren<sup>10</sup>, Ronald  
6 Walter<sup>2</sup>, Axel Meyer<sup>11</sup> #, John H Postlethwait<sup>5</sup> #

7

8 <sup>1</sup>Developmental Biochemistry, Biocenter, University of Wuerzburg, Am Hubland, 97074 Wuerzburg,  
9 Germany

10 <sup>2</sup>The Xiphophorus Genetic Stock Center, Department of Chemistry and Biochemistry, Texas State  
11 University, San Marcos, Texas, TX 78666, USA

12 <sup>3</sup>Biochemistry and Cell Biology, Biocenter, University of Wuerzburg, Am Hubland, 97074 Wuerzburg,  
13 Germany

14 <sup>4</sup>Systematic Biology, Department of Organismal Biology, Uppsala University, Norbyvägen 18D, 752  
15 36 Uppsala, Sweden

16 <sup>5</sup>Institute of Neuroscience, University of Oregon, Eugene, Oregon, OR 97401, USA

17 <sup>6</sup>Department of Animal Biology, University of Illinois, Urbana, Illinois, IL 6812, USA

18 <sup>7</sup>Julius-von-Sachs-Institute for Biosciences, Molecular Plant Physiology and Biophysics, Biocenter,  
19 University Würzburg, Julius-von-Sachs-Platz 2, 97082 Würzburg, Germany.

20 <sup>8</sup>Department of Biology, Texas A&M University, College Station, Texas, TX 77843, USA.

21 <sup>9</sup>Department of Biological Sciences and Centre for Bioimaging Sciences, National University of  
22 Singapore, Singapore 117543, Singapore

23 <sup>10</sup>Bond Life Sciences Center, University of Missouri, Columbia, MO USA

24 <sup>11</sup>Lehrstuhl für Zoologie und Evolutionsbiologie, Department of Biology, University of Konstanz,  
25 Universitätsstraße 10, 78457 Konstanz, Germany

26

27

28 # Corresponding authors

29

30

31

32

33

34

35

## 36 **Abstract**

37  
38 *Sexual selection results in sex-specific characters like the conspicuously pigmented extension of the*  
39 *ventral tip of the caudal fin - the “sword” - in males of several species of *Xiphophorus* fishes. To uncover*  
40 *the genetic architecture underlying sword formation and to identify genes that are associated with its*  
41 *development, we characterized the sword transcriptional profile and combined it with genetic mapping*  
42 *approaches. Results showed that the male ornament of swordtails develops from a sexually non-*  
43 *dimorphic prepattern of transcription factors in the caudal fin. Among genes that constitute the*  
44 *exclusive sword transcriptome only two are located in the genomic region associated with this trait; the*  
45 *chaperone, *fkbp9*, and the potassium channel, *kcnh8* that in addition to its neural function performs a*  
46 *role known to affect fin growth. This indicates that during evolution of swordtails a brain gene has been*  
47 *recruited for an additional function in establishing a male ornament.*

48  
49

## 50 **Introduction**

51 The evolution of male ornaments has intrigued biologists ever since Charles Darwin struggled to explain  
52 how exaggerated, expensive and likely deleterious structures like the peacock’s tail or the horn of male  
53 unicorn beetles might have arisen by natural selection. Twelve years after the publication of his book  
54 “On the origin of species”, Darwin wrote his second most influential book not on the role of natural, but  
55 on sexual selection in evolution [1]. He described the “sword” of the green swordtail, *Xiphophorus*  
56 *hellerii* as an example for his theory on sexual selection and postulated that selection by female choice  
57 can be a strong mechanism that could explain the evolution of traits that are clearly detrimental in terms  
58 of natural selection [1]. In several species of the genus *Xiphophorus* (Greek for dagger bearer) males  
59 carry the sword, a conspicuous extension of the ventral fin rays of the caudal fin that is brightly colored  
60 yellow, orange or red and is surrounded by a dark black margin (Fig. 1). The sword develops at puberty  
61 and can be as long as the fish itself in some species. Its morphogenesis is instructed by the ventral  
62 proximal caudal fin rays, called the “sword organizer” [2]. The sword is a male restricted trait, but  
63 female swordtails develop swords like males when treated with testosterone [3, 4]. This suggests that a  
64 potential sexual conflict has been solved by a strict androgen dependency for expression of the  
65 phenotype. Females of *Xiphophorus hellerii* and several other species preferentially associate with  
66 males carrying a longer sword over males with shorter swords, which is thought to result in a higher  
67 mating success of long-sworded males [5, 6]. This process exemplifies run-away Fisherian evolution  
68 for exaggerated male traits [7]. However, there are also trade-offs [8, 9], because swords attract not only  
69 females, but also predators [10], and escape from predators is more difficult because the sword reduces  
70 swimming performance [11]. Several species of the genus *Xiphophorus*, including the so-called  
71 platyfishes, do not have this sexually dimorphic character (Fig. 1), even though, surprisingly, females  
72 nevertheless prefer heterospecific sworded males over their own swordless conspecifics [5]. This  
73 observation was used to support a major hypothesis in evolutionary ecology, namely that female

74 preference may drive sexual selection by sensory exploitation since the bias in females was thought to  
75 be older than the sword itself [12, 13]. However, molecular phylogenies showed that the sword is an  
76 ancestral state [8, 14-16] and implied that derived swordless species had lost the male ornament  
77 secondarily, but retained the presumably ancestral female preference for them. This phylogenetic  
78 inference fueled the discussion about which evolutionary forces drove the evolution and loss of this  
79 conspicuous trait (see [17, 18] [19-21]).

80 Sword length is a species-specific character and is even polymorphic in two species of Northern  
81 swordtails. Females of different *Xiphophorus* species show differences in their preference for sword [5,  
82 22]. Female preferences such as this are considered to potentially not only drive the evolution of male  
83 ornaments, but also to result in speciation [23-25]. In the genus *Xiphophorus*, the widespread propensity  
84 to prefer sworded males lead to the formation of two hybrid species *X. clemenciae* [8, 21] and *X.*  
85 *monticolus* [16] where, due to the preference for swords females of non-sworded species hybridized  
86 with males of swords species to bring about new, sworded hybrid species.

87 A huge body of literature on how both sexual and natural selection can lead to speciation has been  
88 published[26, 27] but almost nothing is known about the genetic basis of male ornaments or male  
89 “weapons” used in male-male competition [28, 29]. To identify the genes on which female preferences  
90 act on is an important task that is necessary to permit the testing of hypotheses regarding the roles of  
91 sexual selection at the molecular genetic level.

92 The swords of swordtails became a textbook example of a sexually selected trait, yet despite research  
93 efforts for almost three decades the molecular genetic basis of sword development remained unknown.  
94 So far, candidate gene approaches involving known genes of fish fin growth and development [30] [31]  
95 and suppression subtractive hybridization cloning [32] have not revealed the secret of the sword.

96 To identify the genetic basis for sword formation, we combined genome-wide expression analysis  
97 during sword development and regeneration with a genetic association study for sword length in a cross  
98 of a non-sworded species to a sworded species.

99

100

## 101 **Results**

102 To obtain a most comprehensive list of protein coding genes that are involved in the formation of the  
103 sword, we compared expression levels using several RNA-seq datasets from the green swordtail,  
104 *Xiphophorus hellerii* (Fig. 1). We reasoned that sword genes should be differentially expressed (i) during  
105 growth of the developing sword of males at puberty (fig. S1) and (ii) during the course of sword  
106 regeneration (fig. S2). Because immature fish and adult females also develop a sword indistinguishable  
107 from the male structure following treatment with androgens [3, 4] we generated (iii) one RNA-seq  
108 dataset from testosterone-treated adult females; and added (iv) our previous dataset from testosterone-  
109 induced swords in pre-pubertal juveniles [3]. Small biopsies from the dorsal and ventral fin margin  
110 during a timed series of growth and of regeneration and from the hormone induced and naturally

111 developed swords from 15-20 individuals were pooled and used for transcriptome sequencing.  
112 Differential expression was deduced from comparison to the corresponding dorsal part of the caudal fin.  
113 The four datasets were overlapped to identify genes that are commonly regulated in all four processes  
114 of sword development (fig. S3). This process yielded a set of 68 regulated genes differentially expressed  
115 ( $\log_2FC \geq 1$ ) in all sword transcriptomes (11 down and 57 upregulated, table S1).  
116 We expected differentially expressed genes to be of two main categories: those primarily responsible  
117 for inducing the sword and those that execute the instruction process by actually building the  
118 components of the sword. The sword, like other parts of the caudal fin, consists of bony fin rays, skin,  
119 pigment cells, sensory neurons, blood vessels and mesenchyme. Amongst genes upregulated in sword  
120 vs control fin regions, four genes (*x<sub>dh</sub>*, *tyr*, *myrip*, *agrp*) are obviously connected to sword pigmentation;  
121 several other upregulated genes are related to increased vascularization (*angptl5*, *angptl 1*) and fin-ray  
122 rigidity (collagens *col9a1*, *col10a1* and extracellular matrix proteins *fib7l*, *spock 2*, *tn-c*, *frem3*, *cd200*,  
123 *and4*, *gpc2*) that support the sword structure as an extremely long outgrowth of ventral fin rays. It is  
124 unclear whether these genes are also critical for the primary process of induction and development of  
125 the sword, but all are reasonably predicted to be involved in later differentiation processes. The sword  
126 transcriptome was also enriched for genes with neural functions (*pdyn*, *draxin*, *kcnh8*, *kcng2*, *chrna7*,  
127 *ncan*, *nrxn*, *lypd6*, *gfra1*) and Ca<sup>2+</sup> signaling (*stc2*, *efcc1*, *fkbp9*, *fkbp11*).  
128 Intriguingly, several transcription factors were included in the differentially expressed genes list and  
129 could be strong candidates for having a critical function in regulating caudal fin development and  
130 consequently also sword formation. *Homeobox protein six2a*, which plays a role in chicken hindlimb  
131 development [33], forms a continuous dorsoventral expression gradient in the swordtail tail fin (Fig. 2A,  
132 table S2), similar to several developmental transcriptional regulators in the establishment of the  
133 zebrafish pectoral fin anterior-posterior axis [34]. The dorsalizing factor *zinc finger protein zic1*, which  
134 is critical for the development of the homocercal fin shape in fish [35] is highly expressed in the dorsal  
135 compartment, but expression is absent from the medial region and all sword transcriptomes (table S2).  
136 More strikingly, *homeobox protein hoxb13a*, which is the most caudally expressed *hox* gene in fish [36],  
137 has high expression in the non-sword regions of the *X. hellerii* caudal fin, but is not expressed in the  
138 sword and the sword-organizer (table S2). During tail fin regeneration, *hoxb13a* is upregulated in the  
139 median and dorsal region but not expressed in the outgrowth leading to the sword (Fig. 2). The *t-box*  
140 *transcription factor tbx3a* gene, which promotes formation of the mesoderm cell lineage [37] and is  
141 involved in vertebrate limb pattern formation [38], is lowly expressed in the non-sword regions of the  
142 tail fin, but abundant in the sword organizer region at the base of the fin, and in the sword during  
143 regeneration, natural sword development and hormone-induced sword (Fig. 2, table S2). The same  
144 expression pattern is displayed by *paired box protein pax9*, which in fish is a critical factor for  
145 development of the hypural plate supporting the peduncle [39], where the caudal fin is inserted (Fig. 2,  
146 table S2). Interestingly, *leukocyte tyrosine kinase receptor (ltk)*, which normally has no spatial  
147 expression pattern in the caudal fin of *X. hellerii* males, builds up a local expression pattern in the sword



148 producing blastema similar to that of *hoxb13a* during caudal fin regeneration and natural and hormone  
149 induced sword development (fig. S4, table S2).

150 Males of two other swordtail species, *X. montezumae* and *X. monticolus* (fig. S5, 6) showed the same  
151 expression gradients and temporal pattern during sword regeneration. Of note, analysis in *X.*  
152 *montezumae*, the species with the longest sword (sword index = sword length/standard body length up  
153 to 1.9), revealed that the transcription factor expression pattern is immediately initiated in the blastema  
154 of the regenerating caudal fin and builds up to the levels of the caudal fin margin and sword during the  
155 first days of growth. The platyfish *X. maculatus*, a species which does not develop a sword, and the  
156 pygmy swordtail, *X. pygmaeus*, where males have only a tiny unpigmented ventral protrusion of the tail  
157 fin but no sword, display the transcription factor gradients in the caudal fin, but these gradients are much  
158 less pronounced and at lower transcript levels (fig. S7-9). Phylogenetic evidence suggested that these  
159 species have lost the sword secondarily [8, 14]. Apparently, the loss of the male ornamental trait is  
160 associated with a decay of this gene expression pre-pattern. The sword arose at the basis of the genus  
161 *Xiphophorus* [8, 14]. In, *Priapella*, a swordless sister genus, the tail fin pattern on which the sword is  
162 built is already present to a large extent. The expression patterns of *pax9*, *tbx3* and *six2a* are conserved,  
163 only *hoxb13a* expression is in additional absent from the dorsal compartment (fig. S8, 9). In the distantly  
164 related medaka, *Oryzias latipes*, the tail fin spatial expression patterns of *hoxb13* and *pax9* are like in  
165 *Xiphophorus*, however, at much lower transcript levels. However, expression of the medaka orthologs  
166 of *tbx3* and *six2a* is not detected in the caudal fin (fig. S9).

167 Importantly, the same expression profile for all five transcription factors was also observed in female  
168 swordtail caudal fins (fig. S10, table S1, S2), although at lower expression levels for *six2a*, *tbx3a* and  
169 *pax9*. However, this finding indicates that a pre-pattern of transcription factors exists in the caudal fin  
170 of both sexes that provides in males the positional information for sword development, but this rules out  
171 those genes as candidates for sword induction.

172 Reasoning that genes that are responsible for sword would be expressed only in males, we thus generated  
173 transcriptomes from upper and lower terminal caudal fin compartments of females and used these to  
174 eliminate genes from candidate status in the sword transcriptome if they showed the same regulation in  
175 male and female caudal fin regeneration. This process still left us with 54 candidate genes (table S1).  
176 To further reduce the number of genes we performed a genetic mapping approach.

177 Thus, we performed QTL mapping using RAD-tags. Because crossing of a swordtail to a nearest  
178 outgroup species prior to evolution of this character (e.g. *Priapella sp.*) is not possible, we used a  
179 congeneric species that has lost the sword. A backcross between the sword-less Southern platyfish *X.*  
180 *maculatus* and the green swordtail *X.hellerii* using *X.hellerii* as the recurrent parent was generated [40].  
181 Mapping the sword-index of 85 backcross males against genetic polymorphisms in the reference  
182 swordtail genome revealed significant association with a region on linkage group (LG) 13 (LOD score  
183 max likelihood = 3.86, non-parametric = 4.87) (Fig. 3, fig. S11). A region on LG 1 (LOD score ml =  
184 3.17, np = 1.57) and LG 9 (LOD score ml = 2.54, np = 2.15) barely failed to reach the significance level.

185 Several minor peaks also appeared on LG's 20 – 24. This result defines the sword as a highly polygenic  
186 trait, which is in accordance with the size distribution of sword lengths in platyfish/swordtail hybrids  
187 [41].

188 When the positions of sword specific differentially expressed genes (table S1) were examined with  
189 respect to the QTL peaks in the 2.0 LOD interval, none of the genes involved in establishing the  
190 prepatter and none of the pigmentation, angiogenesis, or ECM genes that were differentially regulated  
191 during sword development were found to be encoded in any of the regions identified in the QTL  
192 analysis. Only two differentially expressed genes with  $\log_2FC \geq 1$  mapped to a QTL peak, both in the  
193 main peak on chromosome 13. These are *fkbp9* and *kcnh8*.

194 The gene encoding the chaperone peptidyl-prolyl cis-trans isomerase *Fkbp9* is 2- to 3-fold higher  
195 expressed in the developing sword than in control tissue and becomes upregulated in sword regeneration  
196 at stages 3-4 (fig. S12, table S2). Expression is not elevated in the sword organizer, which weakens its  
197 candidacy as a gene responsible for induction of sword development.

198 The other gene that has overlapping candidacy from both gene expression and mapping studies is *kcnh8*.  
199 *Kcnh8* is a potassium channel of the *ether-à-go-go* (EAG) type that is expressed abundantly in brain  
200 and at intermediate levels in ovary and testis (Fig. 4A). Importantly, *kcnh8* is strongly upregulated in  
201 the sword during normal development and following androgen treatments, in the sword organizer  
202 region, and in the fully developed sword, and becomes strongly upregulated during sword regeneration  
203 (Fig. 4B, table S2). It is always amongst the 0.3% of most differentially expressed genes (>21,000 total).  
204 Transcripts of *kcnh8* are almost absent from all other fin areas of males and *kcnh8* is only expressed at  
205 background levels in female caudal fins.

206 Expression of swordtail *Kcnh8* in the *Xenopus* oocyte system and two-electrode voltage clamp analyses  
207 revealed that the protein has the hallmark characteristics of a fully functional voltage gated potassium  
208 channel member of the  $K_v12.1$  family[42] in terms of voltage activation characteristics, time-dependent  
209 activation kinetics, potassium selectivity and inhibition by  $Ba^{2+}$  ions (Fig. 5).

210 We found that also *X. montezumae*, which has an even longer sword than *X. hellerii*, has the same high  
211 expression of *kcnh8* in the sword and during sword regeneration (fig. S13). Interestingly, in species that  
212 develops shorter sword than *X.hellerii* or only tiny protrusions swords, *X. monticolus* and *X. pygmaeus*,  
213 *kcnh8* expression during sword regeneration is only weakly upregulated. In the swordless platyfish *X.*  
214 *maculatus*, no differential expression of *kcnh8* was noted between the lower and upper compartment  
215 and during regeneration of the caudal fin (fig. S13).

216

217

## 218 Discussion

219 Sexually selected traits are present in many species and a hallmark of sexual dimorphism between males  
220 and females. The evolutionary mechanism driving their origin, maintenance and role in speciation have  
221 been widely studied, but today little is known about the proximate causes, i.e. the genes encoding

222 sexually selected traits and their function in development of the structure, aside a few examples from  
223 *Drosophila* [43, 44]. The sword is a male specific outgrowth of the lower margin of the caudal fin and  
224 we wanted to know what genes provoke its sex-specific elongation. The fins of fish are intricate three-  
225 dimensional structures composed of numerous cell types. Size, shape, pigmentation and other features  
226 of fins are generally highly fixed and specific for different species and certain ontogenetic stages. In  
227 many species fins are sexually dimorphic traits [45]. In zebrafish it has been shown that pectoral fins  
228 have a regionalized gene expression pattern that creates gradients of transcription factors [34]. We  
229 conclude that also in the caudal fin of male swordtails a similar specific regionalized gene activity  
230 pattern provides the positional information for development of the sword. The regional expression of  
231 the transcription factors *Hoxb13a*, *Six2a*, *Tbx3a* and *Pax9* produces a prepattern in the tail fin that is  
232 connected to sword development since the expression pattern vanishes in species that have secondarily  
233 lost the sword. This pattern is established before the sword develops during puberty and its presence  
234 (with minor deviations) in adult females may allow the development of a sword after experimental  
235 androgen treatment or as a natural phenomenon in old post-reproductive females [46, 47].  
236 To identify those genes that are determining the development of the sword in males we reasoned that  
237 such genes should be differentially expressed in sword development and encoded in genomic regions  
238 that are linked to this trait. Our QTL analysis, consistent with earlier genetic findings [41], uncovered  
239 that several chromosomal regions contribute to the polygenic basis of the male structure. Consistently,  
240 the major locus on chromosome 13 fully overlaps a similar broad QTL that was obtained in an  
241 independent study for the character sword length in natural hybrids between a swordless (*X. birchmanni*)  
242 and a sworded (*X. malinche*) Northern swordtail species [48]. We identified two candidate genes that  
243 appear to be involved in the development of the sword. Rather than being typical regulators of  
244 development and differentiation such as transcription factors or extracellular diffusible growth factors,  
245 experiments identified a channel protein, *kcnh8*, and a chaperone, *fkpb9*.  
246 In zebrafish long fin mutants, mutations in several potassium channel genes, including *kcnh2a*, *kcnk5b*,  
247 and *kcc4a* cause various types of fin overgrowth [49-51]. In fighting fish, *Betta splendens*, *kcnh8* mis-  
248 expression is associated with pectoral fin overgrowth (Wang et al. submitted). A hyperpolarizing  
249 mutation in *kcnk5b* causes the long fin phenotype in ornamental goldfish [52]. Mutations disrupting ion  
250 channels and ion-dependent signaling are extensively related to abnormal organ development and  
251 regeneration via bioelectrical regulation [53]. Potassium channels of the *Kcnh* family have been  
252 implicated in cell proliferation by influencing membrane polarization and thus calcium signaling [54,  
253 55]. Increased intracellular calcium levels activate osteoblasts and their precursors [56, 57], which build  
254 the fin rays of the overgrowing structures of the long-fin mutants and the *Xiphophorus* sword. Potassium  
255 channels can also play a role in cell cycle and proliferation control by mechanisms unrelated to ion  
256 channel permeability [55]. Despite this wide spectrum of biological functions of potassium channels  
257 besides the classical channel properties, their transcriptional regulation and biochemical interactions are  
258 not well understood.

259 Voltage gated channels of the EAG family are inhibited by intracellular calcium [58]. One function of  
260 Fkpb9 besides acting as a prolyl cis-trans isomerase is mediated through its calcium binding Ef-H  
261 domain [59]. In zebrafish tailfin growth a predominant role for the calcium activated protein phosphatase  
262 calcineurin was shown. In this case inhibition of this pathway led to unscheduled outgrowth of the caudal  
263 fin margin [60].

264 Kcnh8 is the pore forming unit of some voltage-gated potassium channels, which have broad functions  
265 mainly in neurotransmitter release and neuronal excitability, but also in epithelial electrolyte transport  
266 and cell volume regulation [55, 61]. In zebrafish, due to the presence of duplicate versions of the channel  
267 protein coding genes, one paralog obviously can fulfill functions restricted to the fin. Mutations of the  
268 “fin” paralog only affect fin growth, while the other channel functions are executed by the second  
269 paralog. However, *kcnh8* is present only as a single copy and it is abundantly expressed in the brain and  
270 to a lesser extent in the gonads of both sexes and additionally only in the male sword of *Xiphophorus*  
271 but importantly not in the corresponding part of the female caudal fin. These expression domains imply  
272 that a neuronal gene was recruited during the evolution of the male ornament about 3-5 million years  
273 ago, early during the diversification of swordtail fish through a rewiring of its regulatory network rather  
274 than by selection on its protein function. The Kcnh8 proteins of *Xiphophorus* species have a few  
275 aminoacid changes, which, however, do not correlate with the presence or absence of a sword in males  
276 (fig. S14). Thus, it is more likely that the function for sword development has been added to the *kcnh8*  
277 gene through changes in gene regulation.

278 The implication of Kcnh8 activity in natural sword development adds a case of an evolutionary mutant  
279 for a potassium channel being involved in regulation of fin growth, which thus far were only seen in  
280 laboratory mutants. It appears that the four genes, *kcnh2a*, *kcnk5b*, *kcc4b* and *kcnh8*, govern a common  
281 pathway of downstream signaling that connects membrane potential, K<sup>+</sup> permeability, eilennummern  
282 and calcium homeostasis to the ubiquitous machinery of cell growth and proliferation. Although  
283 swordtails, because of their livebearing mode of reproduction are not amenable to transgenic  
284 technologies, the induced fin mutants of egg laying fish can be employed to systematically knock-out  
285 candidate signal transducers and elucidate the interface between ion channels and growth control.

## 286 **Acknowledgements**

287 This work was supported by the Deutsche Forschungsgemeinschaft (grants 5263398, 163418330 and  
288 5446040 to AM) and by NIH grant 5R01OD011116 (JHP), 5R24OD018555 (JHP, MS, RW, WW).

289

290

291

292

## 293 Authors contributions

294 MS, AM and JHP conceived the study and coordinated the work. JA, AA, JC, JW and JHP did  
295 the QTL mapping, JO and CS prepared RNA and performed the qRT-PCR experiments, DG  
296 and RH characterized the channel properties of *Xiphophorus* Kcni8, SS and CW analyzed  
297 sword growth and regeneration, SK, DK and MGO analyzed the RNA-seq data and intersected  
298 the expression with the QTL data, AM contributed RNA-seq data from androgen induced  
299 swords, WCW and RW contributed the *Xiphophorus hellerii* genome, MS analyzed all data and  
300 drafted the manuscript, all authors were involved in preparing the final version of the  
301 manuscript.

## 302 Competing interests

303 All authors declare no competing interests.

304

305

306

307

- 308 1. Darwin, C., *The Descent of Man and Selection in Relation to Sex*. 1871, London: John  
309 Murray.
- 310 2. Eibner, C., et al., *An organizer controls the development of the "sword," a sexually*  
311 *selected trait in swordtail fish*. *Evol Dev*, 2008. **10**(4): p. 403-12.
- 312 3. Kang, J.H., et al., *Transcriptomics of two evolutionary novelties: how to make a sperm-*  
313 *transfer organ out of an anal fin and a sexually selected "sword" out of a caudal fin*.  
314 *Ecol Evol*, 2015. **5**(4): p. 848-64.
- 315 4. Dzwillo, M., *Sekundäre Geschlechtsmerkmale an der Caudalflosse einiger*  
316 *Xiphophorini unter dem Einfluß von Methyltestosteron*. *Mitt. Hamburg. Zool. Mus. Inst*,  
317 1964(61): p. 15-22.
- 318 5. Basolo, A.L., *Female preference predates the evolution of the sword in swordtail fish*.  
319 *Science*, 1990. **250**(4982): p. 808-10.
- 320 6. Basolo, A.L., *Evolutionary change in a receiver bias: a comparison of female*  
321 *preference functions*. *Proc Biol Sci*, 1998. **265**(1411): p. 2223-8.
- 322 7. Fisher, R.A., *The Genetical Theory of Natural Selection*. 1930, Oxford: Oxford  
323 University Press.
- 324 8. Meyer, A., J.M. Morrissey, and M. Schartl, *Recurrent origin of a sexually selected trait*  
325 *in Xiphophorus fishes inferred from a molecular phylogeny*. *Nature*, 1994. **368**(6471):  
326 p. 539-42.
- 327 9. Wagner, W.E., Jr., et al., *Tradeoffs limit the evolution of male traits that are attractive*  
328 *to females*. *Proc Biol Sci*, 2012. **279**(1739): p. 2899-906.
- 329 10. Rosenthal, G.G., et al., *Shared preferences by predators and females for male*  
330 *ornaments in swordtails*. *Am Nat*, 2001. **158**(2): p. 146-54.
- 331 11. Basolo, A.L. and G. Alcaraz, *The turn of the sword: length increases male swimming*  
332 *costs in swordtails*. *Proc Biol Sci*, 2003. **270**(1524): p. 1631-6.
- 333 12. Endler, J.A., *Signals, signal conditions, and the direction of evolution*. *American*  
334 *Naturalist*, 1992. **139**: p. 125-153.
- 335 13. Ryan, M.J., *Sexual selection, sensory systems and sensory exploitation*. *Oxford Surveys*  
336 *in Evolutionary Biology*, 1990. **7**: p. 157-195.
- 337 14. Jones, J.C., et al., *The evolutionary history of Xiphophorus fish and their sexually*  
338 *selected sword: a genome-wide approach using restriction site-associated DNA*



- 339 *sequencing*. Mol Ecol, 2013. **22**(11): p. 2986-3001.
- 340 15. Cui, R., et al., *Phylogenomics reveals extensive reticulate evolution in Xiphophorus*  
341 *fishes*. Evolution, 2013. **67**(8): p. 2166-79.
- 342 16. Kang, J.H., et al., *Comprehensive phylogenetic analysis of all species of swordtails and*  
343 *platies (Pisces: Genus Xiphophorus) uncovers a hybrid origin of a swordtail fish,*  
344 *Xiphophorus monticolus, and demonstrates that the sexually selected sword originated*  
345 *in the ancestral lineage of the genus, but was lost again secondarily*. BMC Evol Biol,  
346 2013. **13**: p. 25.
- 347 17. Pomiankowski, A., *Sexual selection. Swordplay and sensory bias*. Nature, 1994.  
348 **368**(6471): p. 494-5.
- 349 18. Da Silva, J., *Male swords and female preferences*. Science, 1991. **253**(5026): p. 1426.
- 350 19. Winquist, S.T., et al., *Male swords and female preferences*. Science, 1991. **253**(5026):  
351 p. 1426.
- 352 20. Endler, J.A. and A.L. Basolo, *Sensory ecology, receiver biases and sexual selection*.  
353 Trends Ecol Evol, 1998. **13**(10): p. 415-20.
- 354 21. Meyer, A., W. Salzburger, and M. Schartl, *Hybrid origin of a swordtail species*  
355 *(Teleostei: Xiphophorus clemenciae) driven by sexual selection*. Mol Ecol, 2006. **15**(3):  
356 p. 721-30.
- 357 22. Wong, B.B. and G.G. Rosenthal, *Female disdain for swords in a swordtail fish*. Am Nat,  
358 2006. **167**(1): p. 136-40.
- 359 23. Coyne, J.A. and H.A. Orr, *Speciation*. 2004, Sunderland, MA: Sinauer.
- 360 24. Mayr, E., *Animal species and evolution*. 1963, Cambridge, MA: Belknap Press of  
361 Harvard University Press.
- 362 25. Ritchie, M.G., *Sexual selection and speciation*. Annual Review of Ecology, Evolution,  
363 and Systematics, 2007. **38**: p. 79-102.
- 364 26. van Doorn, G.S., P. Edelaar, and F.J. Weissing, *On the origin of species by natural and*  
365 *sexual selection*. Science, 2009. **326**(5960): p. 1704-7.
- 366 27. Tinghitella, R.M., et al., *On the role of male competition in speciation: a review and*  
367 *research agenda*. Behavioral Ecology, 2017. **29**(4): p. 783-797.
- 368 28. Gotoh, H., et al., *The function of appendage patterning genes in mandible development*  
369 *of the sexually dimorphic stag beetle*. Dev Biol, 2017. **422**(1): p. 24-32.
- 370 29. Kraaijeveld, K., *Genetic architecture of novel ornamental traits and the establishment*  
371 *of sexual dimorphism: insights from domestic birds*. Journal of Ornithology, 2019.  
372 **160**(3): p. 861-868.
- 373 30. Zauner, H., et al., *Differential regulation of msx genes in the development of the*  
374 *gonopodium, an intromittent organ, and of the "sword," a sexually selected trait of*  
375 *swordtail fishes (Xiphophorus)*. Evol Dev, 2003. **5**(5): p. 466-77.
- 376 31. Offen, N., et al., *Fgfr1 signalling in the development of a sexually selected trait in*  
377 *vertebrates, the sword of swordtail fish*. BMC Dev Biol, 2008. **8**: p. 98.
- 378 32. Offen, N., A. Meyer, and G. Begemann, *Identification of novel genes involved in the*  
379 *development of the sword and gonopodium in swordtail fish*. Dev Dyn, 2009. **238**(7): p.  
380 1674-87.
- 381 33. Yamamoto-Shiraishi, Y. and A. Kuroiwa, *Wnt and BMP signaling cooperate with Hox*  
382 *in the control of Six2 expression in limb tendon precursor*. Dev Biol, 2013. **377**(2): p.  
383 363-74.
- 384 34. Nachtrab, G., et al., *Transcriptional components of anteroposterior positional*  
385 *information during zebrafish fin regeneration*. Development, 2013. **140**(18): p. 3754-  
386 64.
- 387 35. Moriyama, Y., et al., *The medaka zic1/zic4 mutant provides molecular insights into*  
388 *teleost caudal fin evolution*. Curr Biol, 2012. **22**(7): p. 601-7.
- 389 36. Corredor-Adamez, M., et al., *Genomic annotation and transcriptome analysis of the*



- 390 *zebrafish (Danio rerio) hox complex with description of a novel member, hox b 13a.*  
391 *Evol Dev*, 2005. **7**(5): p. 362-75.
- 392 37. Waghray, A., et al., *Tbx3 Controls Dppa3 Levels and Exit from Pluripotency toward*  
393 *Mesoderm*. *Stem Cell Reports*, 2015. **5**(1): p. 97-110.
- 394 38. Rallis, C., J. Del Buono, and M.P. Logan, *Tbx3 can alter limb position along the*  
395 *rostrocaudal axis of the developing embryo*. *Development*, 2005. **132**(8): p. 1961-70.
- 396 39. Mise, T., et al., *Function of Pax1 and Pax9 in the sclerotome of medaka fish*. *Genesis*,  
397 2008. **46**(4): p. 185-92.
- 398 40. Amores, A., et al., *A RAD-Tag Genetic Map for the Platyfish (Xiphophorus maculatus)*  
399 *Reveals Mechanisms of Karyotype Evolution Among Teleost Fish*. *Genetics*, 2014.  
400 **197**(2): p. 625-641.
- 401 41. Zander, C.D.D., M., *Untersuchungen zur Entwicklung und Vererbung des*  
402 *Caudalfortsatzes der Xiphophorus-Arten(Pisces)*. *Z Wissenschaftliche Zool* 1969. **178**:  
403 p. 267-315.
- 404 42. Zou, A., et al., *Distribution and functional properties of human KCNH8 (Elk1)*  
405 *potassium channels*. *Am J Physiol Cell Physiol*, 2003. **285**(6): p. C1356-66.
- 406 43. Cloud-Richardson, K.M., B.R. Smith, and S.J. Macdonald, *Genetic dissection of*  
407 *intraspecific variation in a male-specific sexual trait in Drosophila melanogaster*.  
408 *Heredity (Edinb)*, 2016. **117**(6): p. 417-426.
- 409 44. Ichimura, K., et al., *Medaka fish, Oryzias latipes, as a model for human obesity-related*  
410 *glomerulopathy*. *Biochem Biophys Res Commun*, 2013. **431**(4): p. 712-7.
- 411 45. Fairbairn, D., *Odd Couples: Extraordinary Differences between the Sexes in the Animal*  
412 *Kingdom*. 2013: Princeton.
- 413 46. Kallman, K.D., *A new look at sex determination in Poeciliid Fishes*, in *Evolutionary*  
414 *Genetics of Fishes*, B.J. Turner, Editor. 1984, Plenum Publishing Corporation. p. 95-  
415 171.
- 416 47. Schartl, M., et al., *A primer of sex determination in poeciliids*, in *Ecology and Evolution*  
417 *of Poeciliid Fishes*, A. Pilastro, J. Evans, and I. Schlupp, Editors. 2010. p. 264-275.
- 418 48. Powell, D.P., C.; Keegan, M.; Banerjee, S.M.; Cui, R.; Andolfatto, P.; Schumer, M.;  
419 Rosenthal, G.G., *The genetic architecture of the sexually selected sword ornament*.  
420 *BioRxiv*, 2020. doi: <https://doi.org/10.1101/2020.07.23.218164>.
- 421 49. Perathoner, S., et al., *Bioelectric signaling regulates size in zebrafish fins*. *PLoS Genet*,  
422 2014. **10**(1): p. e1004080.
- 423 50. Lanni, J.S., et al., *Integrated K<sup>+</sup> channel and K<sup>+</sup>Cl<sup>-</sup> cotransporter functions are*  
424 *required for the coordination of size and proportion during development*. *Dev Biol*,  
425 2019. **456**(2): p. 164-178.
- 426 51. Stewart, S.L.B., H.K.; Yette, G.A.; Henner, A.L.; Braunstein, J.A., Stankunas, K.,  
427 *longfin causes cis-ectopic expression of the kcnh2a ether-a-go-go K<sup>+</sup> channel to*  
428 *autonomously prolong fin outgrowth*. . *BioRxiv*, 2019.
- 429 52. Kon, T., et al., *The Genetic Basis of Morphological Diversity in Domesticated Goldfish*.  
430 *Curr Biol*, 2020. **30**(12): p. 2260-2274 e6.
- 431 53. McLaughlin, K.A. and M. Levin, *Bioelectric signaling in regeneration: Mechanisms of*  
432 *ionic controls of growth and form*. *Dev Biol*, 2018. **433**(2): p. 177-189.
- 433 54. Sundelacruz, S., M. Levin, and D.L. Kaplan, *Role of membrane potential in the*  
434 *regulation of cell proliferation and differentiation*. *Stem Cell Rev Rep*, 2009. **5**(3): p.  
435 231-46.
- 436 55. Urrego, D., et al., *Potassium channels in cell cycle and cell proliferation*. *Philos Trans*  
437 *R Soc Lond B Biol Sci*, 2014. **369**(1638): p. 20130094.
- 438 56. Jung, H. and O. Akkus, *Activation of intracellular calcium signaling in osteoblasts*  
439 *colocalizes with the formation of post-yield diffuse microdamage in bone matrix*.  
440 *Bonekey Rep*, 2016. **5**: p. 778.

- 441 57. Goltzman, D. and G.N. Hendy, *The calcium-sensing receptor in bone--mechanistic and*  
442 *therapeutic insights*. Nat Rev Endocrinol, 2015. **11**(5): p. 298-307.
- 443 58. Han, B., et al., *Eag1 K(+) Channel: Endogenous Regulation and Functions in Nervous*  
444 *System*. Oxid Med Cell Longev, 2017. **2017**: p. 7371010.
- 445 59. Somarelli, J.A., et al., *Structure-based classification of 45 FK506-binding proteins*.  
446 *Proteins*, 2008. **72**(1): p. 197-208.
- 447 60. Kujawski, S., et al., *Calcineurin regulates coordinated outgrowth of zebrafish*  
448 *regenerating fins*. Dev Cell, 2014. **28**(5): p. 573-87.
- 449 61. Jan, L.Y. and Y.N. Jan, *Voltage-gated potassium channels and the diversity of electrical*  
450 *signalling*. J Physiol, 2012. **590**(11): p. 2591-9.
- 451  
452  
453  
454  
455  
456  
457  
458  
459

460

## Figures

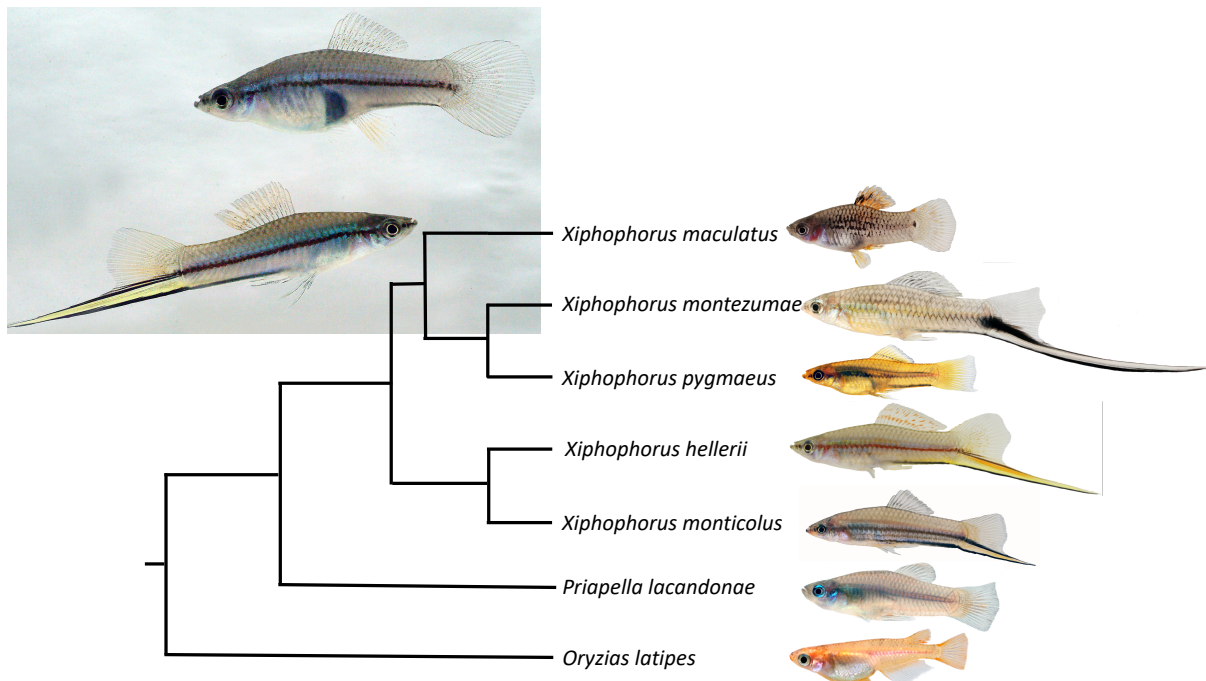

461  
462  
463  
464  
465

**Fig. 1. Phylogenetic relationships of sworded and non-sworded *Xiphophorus* species.** The swordless *Priapella lacandonae* is the nearest (sister genus) and medaka, *Oryzias latipes*, a distant outgroup. Insert shows female (upper) and male (lower) of the green swordtail, *Xiphophorus hellerii*.

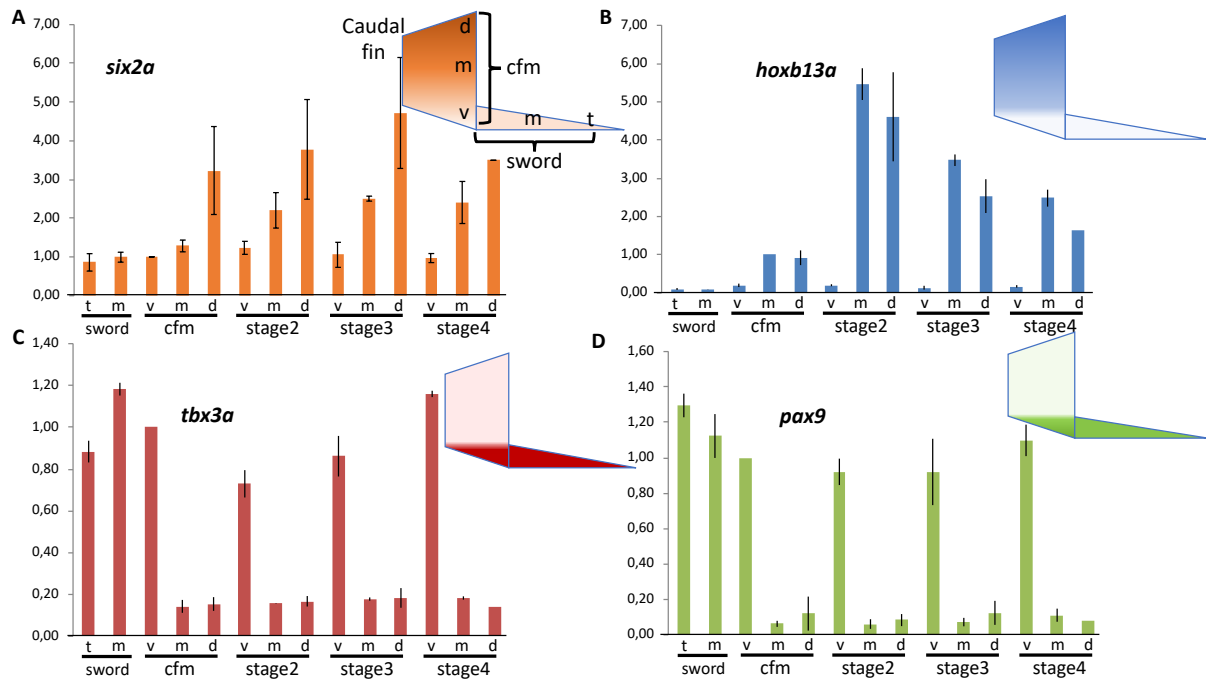

466

467

468 **Fig. 2. Spatial expression pattern of transcription factor genes in the caudal fin and sword of male**

469 *Xiphophorus hellerii*. Expression of *six2a* (A), *hoxb13a* (B), *tbx3a* (C) and *pax9* (D) in the caudal fin

470 margin of the tail fin (cfm) of adult *Xiphophorus hellerii* males, the median sector (m) and tip (t) of the

471 sword and during sword regeneration (v, ventral, m, median, d, dorsal compartment). Vertical axis

472 indicates fold change of expression normalized to cfm, v (*six2a*, *tbx3a*, *pax9*) or cfm, m (*hoxb13a*).

473

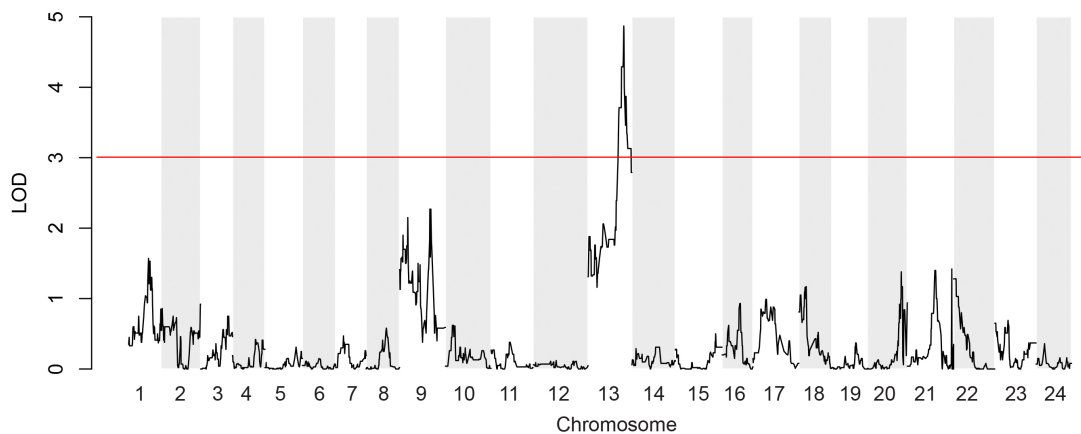

474

475 **Fig. 3. Manhattan plot of quantitative trait loci (QTL) mapping results for sword length. One**

476 major QTL peak is located on chromosome 13, two minor peaks on chromosomes 1 and 9. The plot

477 depicts aligned RAD-tag positions on the *Xiphophorus hellerii* genome version 4.1 with non-parametric

478 statistics

479

480

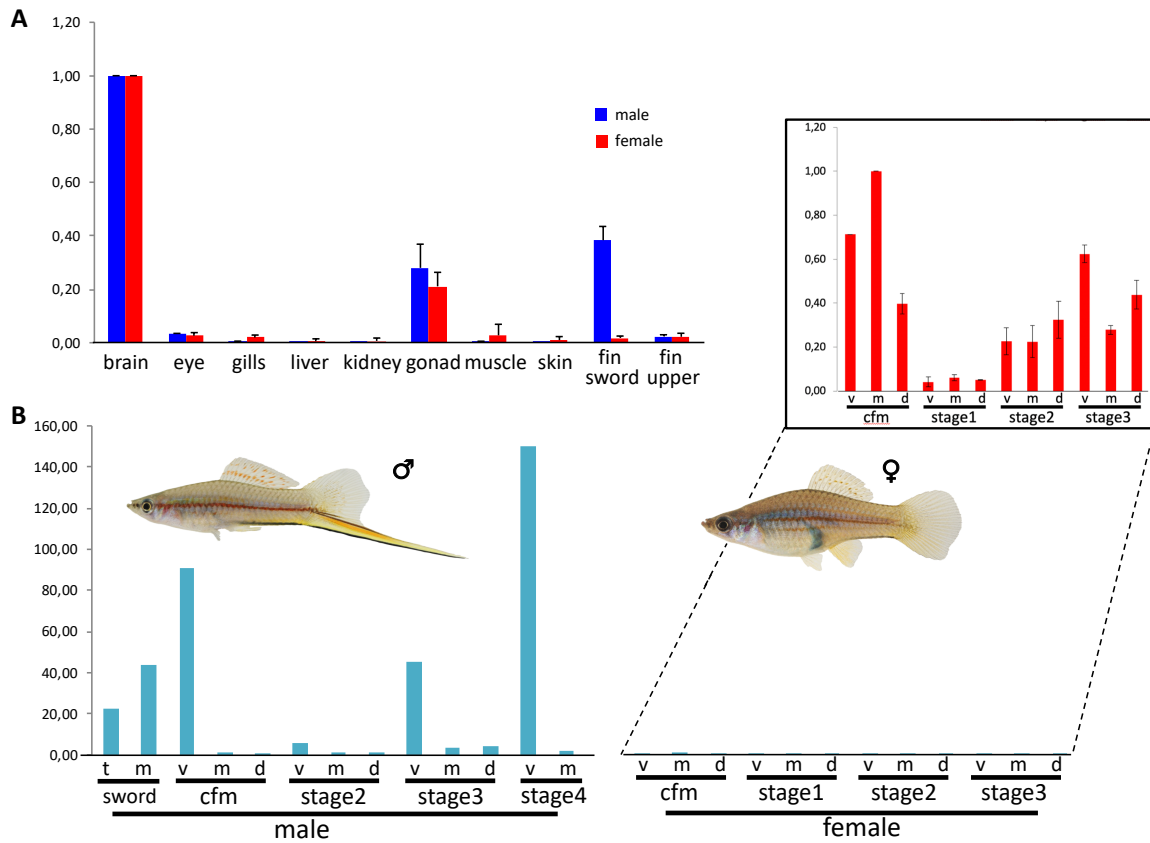

481  
 482 **Fig. 4. Expression of *kcnh8* in adult males and females of *Xiphophorus hellerii*.** (A) Organ-specific  
 483 expression profile in adult females and males. (B) Expression of *kcnh8* in the caudal fin margin of the  
 484 tail fin (cfm) of adult *Xiphophorus hellerii* males and females, the median sector (m) and tip (t) of the  
 485 sword and during caudal fin regeneration (v, ventral, m, median, d, dorsal compartment). Insert:  
 486 expression in females upscaled. Vertical axis indicates fold change of expression normalized to brain  
 487 (A), cfm, m (B).  
 488

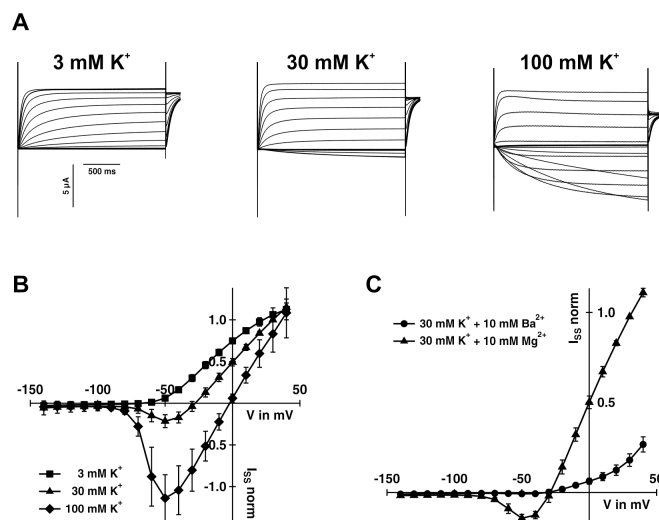

490 **Fig. 5. Electrical features of *Xiphophorus hellerii* Kcnh8.** (A) Representative TEVC recordings of  
491 KCNH8-expressing *Xenopus* oocytes at the indicated potassium concentrations. Test voltages ranged  
492 between +40 to -140 mV in 10 mV decrements. (B) Steady-state currents ( $I_{SS}$ ) extracted from recordings  
493 as shown in A) of KCNH8-expressing oocytes were plotted as a function of the applied membrane  
494 potential (mean of  $n \geq 7$  oocytes  $\pm$  SD of  $\geq 3$  independent experiments). (C) Application of 10 mM  
495  $BaCl_2$  in the presence of 30 mM KCl inhibited the KCNH8-mediated  $I_{SS}$  (mean of  $n = 6$  oocytes  $\pm$  SD  
496 of  $\geq 2$  independent experiments). (B) and (C)  $I_{SS}$  were normalized to the currents at +30 mV in standard  
497 bath medium (30 mM KCl).  
498  
499
