1 **Title:** The developmental and genetic architecture of the sexually selected male ornament of  
2 swordtails

3  
4 **Authors:** Manfred Scharl<sup>1,2</sup>, Susanne Kneitz<sup>3</sup>, Jenny Ormanns<sup>3</sup>, Cornelia Schmidt<sup>3</sup>, Jennifer L  
5 Anderson<sup>4</sup>, Angel Amores<sup>5</sup>, Julian Catchen<sup>6</sup>, Catherine Wilson<sup>5</sup>, Dietmar Geiger<sup>7</sup>, Kang Du<sup>1,2</sup>, Mateo  
6 Garcia-Olazábal<sup>8</sup>, Sudha Sudaram<sup>9</sup>, Christoph Winkler<sup>9</sup>, Rainer Hedrich<sup>7</sup>, Wesley C Warren<sup>10</sup>, Ronald  
7 Walter<sup>2</sup>, Axel Meyer<sup>11</sup>#, John H Postlethwait<sup>5</sup>#

8  
9 <sup>1</sup>Developmental Biochemistry, Biocenter, University of Wuerzburg, Am Hubland, 97074 Wuerzburg,  
10 Germany

11 <sup>2</sup>The Xiphophorus Genetic Stock Center, Department of Chemistry and Biochemistry, Texas State  
12 University, San Marcos, Texas, TX 78666, USA

13 <sup>3</sup>Biochemistry and Cell Biology, Biocenter, University of Wuerzburg, Am Hubland, 97074  
14 Wuerzburg, Germany

15 <sup>4</sup>Systematic Biology, Department of Organismal Biology, Uppsala University, Norbyvägen 18D, 752  
16 36 Uppsala, Sweden

17 <sup>5</sup>Institute of Neuroscience, University of Oregon, Eugene, Oregon, OR 97401, USA

18 <sup>6</sup>Department of Animal Biology, University of Illinois, Urbana, Illinois, IL 6812, USA

19 <sup>7</sup>Julius-von-Sachs-Institute for Biosciences, Molecular Plant Physiology and Biophysics, Biocenter,  
20 University Würzburg, Julius-von-Sachs-Platz 2, 97082 Würzburg, Germany.

21 <sup>8</sup>Department of Biology, Texas A&M University, College Station, Texas, TX 77843, USA.

22 <sup>9</sup>Department of Biological Sciences and Centre for Bioimaging Sciences, National University of  
23 Singapore, Singapore 117543, Singapore

24 <sup>10</sup>Bond Life Sciences Center, University of Missouri, Columbia, MO USA

25 <sup>11</sup>Lehrstuhl für Zoologie und Evolutionsbiologie, Department of Biology, University of Konstanz,  
26 Universitätsstraße 10, 78457 Konstanz, Germany

27  
28  
29 # Corresponding authors

30  
31  
32  
33  
34  
35  
36

37 **Abstract**

38  
39 *Sexual selection results in sex-specific characters like the conspicuously pigmented extension of the*  
40 *ventral tip of the caudal fin - the “sword” - in males of several species of *Xiphophorus* fishes. To*  
41 *uncover the genetic architecture underlying sword formation and to identify genes that are associated*  
42 *with its development, we characterized the sword transcriptional profile and combined it with genetic*  
43 *mapping approaches. Results showed that the male ornament of swordtails develops from a sexually*  
44 *non-dimorphic prepattern of transcription factors in the caudal fin. Among genes that constitute the*  
45 *exclusive sword transcriptome only two are located in the genomic region associated with this trait;*  
46 *the chaperone, *fkbp9*, and the potassium channel, *kcnh8* that in addition to its neural function*  
47 *performs a role known to affect fin growth. This indicates that during evolution of swordtails a brain*  
48 *gene has been recruited for an additional function in establishing a male ornament.*

49  
50

51 **Introduction**

52 The evolution of male ornaments has intrigued biologists ever since Charles Darwin struggled to  
53 explain how exaggerated, expensive and likely deleterious structures like the peacock’s tail or the horn  
54 of male unicorn beetles might have arisen by natural selection. Twelve years after the publication of  
55 his book “On the origin of species”, Darwin wrote his second most influential book not on the role of  
56 natural, but on sexual selection in evolution [1]. He described the “sword” of the green swordtail,  
57 *Xiphophorus hellerii* as an example for his theory on sexual selection and postulated that selection by  
58 female choice can be a strong mechanism that could explain the evolution of traits that are clearly  
59 detrimental in terms of natural selection [1]. In several species of the genus *Xiphophorus* (Greek for  
60 dagger bearer) males carry the sword, a conspicuous extension of the ventral fin rays of the caudal fin  
61 that is brightly colored yellow, orange or red and is surrounded by a dark black margin (Fig. 1). The  
62 sword develops at puberty and can be as long as the fish itself in some species. Its morphogenesis is  
63 instructed by the ventral proximal caudal fin rays, called the “sword organizer” [2]. The sword is a  
64 male restricted trait, but female swordtails develop swords like males when treated with testosterone  
65 [3, 4]. This suggests that a potential sexual conflict has been solved by a strict androgen dependency  
66 for expression of the phenotype. Females of *Xiphophorus hellerii* and several other species  
67 preferentially associate with males carrying a longer sword over males with shorter swords, which is  
68 thought to result in a higher mating success of long-sworded males [5, 6]. This process exemplifies  
69 run-away Fisherian evolution for exaggerated male traits [7]. However, there are also trade-offs [8, 9],  
70 because swords attract not only females, but also predators [10], and escape from predators is more  
71 difficult because the sword reduces swimming performance [11]. Several species of the genus  
72 *Xiphophorus*, including the so-called platyfishes, do not have this sexually dimorphic character (Fig.  
73 1), even though, surprisingly, females nevertheless prefer heterospecific sworded males over their own  
74 swordless conspecifics [5]. This observation was used to support a major hypothesis in evolutionary

75 ecology, namely that female preference may drive sexual selection by sensory exploitation since the  
76 bias in females was thought to be older than the sword itself [12, 13]. However, molecular phylogenies  
77 showed that the sword is an ancestral state [8, 14-16] and implied that derived swordless species had  
78 lost the male ornament secondarily, but retained the presumably ancestral female preference for them.  
79 This phylogenetic inference fueled the discussion about which evolutionary forces drove the evolution  
80 and loss of this conspicuous trait (see [17, 18] [19-21]).

81 Sword length is a species-specific character and is even polymorphic in two species of Northern  
82 swordtails. Females of different *Xiphophorus* species show differences in their preference for sword  
83 [5, 22]. Female preferences such as this are considered to potentially not only drive the evolution of  
84 male ornaments, but also to result in speciation [23-25]. In the genus *Xiphophorus*, the widespread  
85 propensity to prefer sworded males lead to the formation of two hybrid species *X. clemenciae* [8, 21]  
86 and *X. monticolus* [16] where, due to the preference for swords females of non-sworded species  
87 hybridized with males of swords species to bring about new, sworded hybrid species.

88 A huge body of literature on how both sexual and natural selection can lead to speciation has been  
89 published [26, 27] but almost nothing is known about the genetic basis of male ornaments or male  
90 “weapons” used in male-male competition [28, 29]. To identify the genes on which female preferences  
91 act on is an important task that is necessary to permit the testing of hypotheses regarding the roles of  
92 sexual selection at the molecular genetic level.

93 The swords of swordtails became a textbook example of a sexually selected trait, yet despite research  
94 efforts for almost three decades the molecular genetic basis of sword development remained unknown.  
95 So far, candidate gene approaches involving known genes of fish fin growth and development [30]  
96 [31] and suppression subtractive hybridization cloning [32] have not revealed the secret of the sword.  
97 To identify the genetic basis for sword formation, we combined genome-wide expression analysis  
98 during sword development and regeneration with a genetic association study for sword length in a  
99 cross of a non-sworded species to a sworded species.

100

101

## 102 **Results**

103 To obtain a most comprehensive list of protein coding genes that are involved in the formation of the  
104 sword, we compared expression levels using several RNA-seq datasets from the green swordtail,  
105 *Xiphophorus hellerii* (Fig. 1). We reasoned that sword genes should be differentially expressed (i)  
106 during growth of the developing sword of males at puberty (fig. S1) and (ii) during the course of  
107 sword regeneration (fig. S2). Because immature fish and adult females also develop a sword  
108 indistinguishable from the male structure following treatment with androgens [3, 4] we generated (iii)  
109 one RNA-seq dataset from testosterone-treated adult females; and added (iv) our previous dataset from  
110 testosterone-induced swords in pre-pubertal juveniles [3]. Small biopsies from the dorsal and ventral  
111 fin margin during a timed series of growth and of regeneration and from the hormone induced and

112 naturally developed swords from 15-20 individuals were pooled and used for transcriptome  
113 sequencing. Differential expression was deduced from comparison to the corresponding dorsal part of  
114 the caudal fin. The four datasets were overlapped to identify genes that are commonly regulated in all  
115 four processes of sword development (fig. S3). This process yielded a set of 68 regulated genes  
116 differentially expressed ( $\log_2FC \geq 1$ ) in all sword transcriptomes (11 down and 57 upregulated, table  
117 S1).

118 We expected differentially expressed genes to be of two main categories: those primarily responsible  
119 for inducing the sword and those that execute the instruction process by actually building the  
120 components of the sword. The sword, like other parts of the caudal fin, consists of bony fin rays, skin,  
121 pigment cells, sensory neurons, blood vessels and mesenchyme. Amongst genes upregulated in sword  
122 vs control fin regions, four genes (*xdh*, *tyr*, *myrip*, *agrp*) are obviously connected to sword  
123 pigmentation; several other upregulated genes are related to increased vascularization (*angptl5*, *angptl*  
124 *1*) and fin-ray rigidity (collagens *col9a1*, *col10a1* and extracellular matrix proteins *fib7l*, *spock 2*, *tn-c*,  
125 *frem3*, *cd200*, *and4*, *gpc2*) that support the sword structure as an extremely long outgrowth of ventral  
126 fin rays. It is unclear whether these genes are also critical for the primary process of induction and  
127 development of the sword, but all are reasonably predicted to be involved in later differentiation  
128 processes. The sword transcriptome was also enriched for genes with neural functions (*pdyn*, *draxin*,  
129 *kcnh8*, *kcng2*, *chrna7*, *ncan*, *nrxn*, *lypd6*, *gfra1*) and  $Ca^{2+}$  signaling (*stc2*, *efcc1*, *fkbp9*, *fkbp11*).

130 Intriguingly, several transcription factors were included in the differentially expressed genes list and  
131 could be strong candidates for having a critical function in regulating caudal fin development and  
132 consequently also sword formation. *Homeobox protein six2a*, which plays a role in chicken hindlimb  
133 development [33], forms a continuous dorsoventral expression gradient in the swordtail tail fin (Fig.  
134 2A, table S2), similar to several developmental transcriptional regulators in the establishment of the  
135 zebrafish pectoral fin anterior-posterior axis [34]. The dorsalizing factor *zinc finger protein zic1*,  
136 which is critical for the development of the homocercal fin shape in fish [35] is highly expressed in the  
137 dorsal compartment, but expression is absent from the medial region and all sword transcriptomes  
138 (table S2). More strikingly, *homeobox protein hoxb13a*, which is the most caudally expressed *hox*  
139 gene in fish [36], has high expression in the non-sword regions of the *X. hellerii* caudal fin, but is not  
140 expressed in the sword and the sword-organizer (table S2). During tail fin regeneration, *hoxb13a* is  
141 upregulated in the median and dorsal region but not expressed in the outgrowth leading to the sword  
142 (Fig. 2). The *t-box transcription factor tbx3a* gene, which promotes formation of the mesoderm cell  
143 lineage [37] and is involved in vertebrate limb pattern formation [38], is lowly expressed in the non-  
144 sword regions of the tail fin, but abundant in the sword organizer region at the base of the fin, and in  
145 the sword during regeneration, natural sword development and hormone-induced sword (Fig. 2, table  
146 S2). The same expression pattern is displayed by *paired box protein pax9*, which in fish is a critical  
147 factor for development of the hypural plate supporting the peduncle [39], where the caudal fin is  
148 inserted (Fig. 2, table S2). Interestingly, *leukocyte tyrosine kinase receptor (ltk)*, which normally has

149 no spatial expression pattern in the caudal fin of *X. hellerii* males, builds up a local expression pattern  
150 in the sword producing blastema similar to that of *hoxb13a* during caudal fin regeneration and natural  
151 and hormone induced sword development (fig. S4, table S2).

152 Males of two other swordtail species, *X. montezumae* and *X. monticolus* (fig. S5, 6) showed the same  
153 expression gradients and temporal pattern during sword regeneration. Of note, analysis in *X.*  
154 *montezumae*, the species with the longest sword (sword index = sword length/standard body length up  
155 to 1.9), revealed that the transcription factor expression pattern is immediately initiated in the blastema  
156 of the regenerating caudal fin and builds up to the levels of the caudal fin margin and sword during the  
157 first days of growth. The platyfish *X. maculatus*, a species which does not develop a sword, and the  
158 pygmy swordtail, *X. pygmaeus*, where males have only a tiny unpigmented ventral protrusion of the  
159 tail fin but no sword, display the transcription factor gradients in the caudal fin, but these gradients are  
160 much less pronounced and at lower transcript levels (fig. S7-9). Phylogenetic evidence suggested that  
161 these species have lost the sword secondarily [8, 14]. Apparently, the loss of the male ornamental trait  
162 is associated with a decay of this gene expression pre-pattern. The sword arose at the basis of the  
163 genus *Xiphophorus* [8, 14]. In, *Priapella*, a swordless sister genus, the tail fin pattern on which the  
164 sword is built is already present to a large extent. The expression patterns of *pax9*, *tbx3* and *six2a* are  
165 conserved, only *hoxb13a* expression is in additional absent from the dorsal compartment (fig. S8, 9).  
166 In the distantly related medaka, *Oryzias latipes*, the tail fin spatial expression patterns of *hoxb13* and  
167 *pax9* are like in *Xiphophorus*, however, at much lower transcript levels. However, expression of the  
168 medaka orthologs of *tbx3* and *six2a* is not detected in the caudal fin (fig. S9).

169 Importantly, the same expression profile for all five transcription factors was also observed in female  
170 swordtail caudal fins (fig. S10, table S1, S2), although at lower expression levels for *six2a*, *tbx3a* and  
171 *pax9*. However, this finding indicates that a pre-pattern of transcription factors exists in the caudal fin  
172 of both sexes that provides in males the positional information for sword development, but this rules  
173 out those genes as candidates for sword induction.

174 Reasoning that genes that are responsible for sword would be expressed only in males, we thus  
175 generated transcriptomes from upper and lower terminal caudal fin compartments of females and used  
176 these to eliminate genes from candidate status in the sword transcriptome if they showed the same  
177 regulation in male and female caudal fin regeneration. This process still left us with 54 candidate  
178 genes (table S1). To further reduce the number of genes we performed a genetic mapping approach.

179 Thus, we performed QTL mapping using RAD-tags. Because crossing of a swordtail to a nearest  
180 outgroup species prior to evolution of this character (e.g. *Priapella sp.*) is not possible, we used a  
181 congeneric species that has lost the sword. A backcross between the sword-less Southern platyfish *X.*  
182 *maculatus* and the green swordtail *X.hellerii* using *X.hellerii* as the recurrent parent was generated  
183 [40]. Mapping the sword-index of 85 backcross males against genetic polymorphisms in the reference  
184 swordtail genome revealed significant association with a region on linkage group (LG) 13 (LOD score  
185 max likelihood = 3.86, non-parametric = 4.87) (Fig. 3, fig. S11). A region on LG 1 (LOD score ml =

186 3.17,  $np = 1.57$ ) and LG 9 (LOD score  $ml = 2.54$ ,  $np = 2.15$ ) barely failed to reach the significance  
187 level. Several minor peaks also appeared on LG's 20 – 24. This result defines the sword as a highly  
188 polygenic trait, which is in accordance with the size distribution of sword lengths in  
189 platyfish/swordtail hybrids [41].

190 When the positions of sword specific differentially expressed genes (table S1) were examined with  
191 respect to the QTL peaks in the 2.0 LOD interval, none of the genes involved in establishing the  
192 prepattern and none of the pigmentation, angiogenesis, or ECM genes that were differentially  
193 regulated during sword development were found to be encoded in any of the regions identified in the  
194 QTL analysis. Only two differentially expressed genes with  $\log_2FC \geq 1$  mapped to a QTL peak, both  
195 in the main peak on chromosome 13. These are *fkbp9* and *kcnh8*.

196 The gene encoding the chaperone peptidyl-prolyl cis-trans isomerase *Fkbp9* is 2- to 3-fold higher  
197 expressed in the developing sword than in control tissue and becomes upregulated in sword  
198 regeneration at stages 3-4 (fig. S12, table S2). Expression is not elevated in the sword organizer,  
199 which weakens its candidacy as a gene responsible for induction of sword development.

200 The other gene that has overlapping candidacy from both gene expression and mapping studies is  
201 *kcnh8*. *Kcnh8* is a potassium channel of the *ether-à-go-go* (EAG) type that is expressed abundantly in  
202 brain and at intermediate levels in ovary and testis (Fig. 4A). Importantly, *kcnh8* is strongly  
203 upregulated in the sword during normal development and following androgen treatments, in the sword  
204 organizer region, and in the fully developed sword, and becomes strongly upregulated during sword  
205 regeneration (Fig. 4B). It is always amongst the 0.3% of most differentially expressed genes (>21,000  
206 total). Transcripts of *kcnh8* are almost absent from all other fin areas of males and *kcnh8* is only  
207 expressed at background levels in female caudal fins.

208 Expression of swordtail *Kcnh8* in the *Xenopus* oocyte system and two-electrode voltage clamp  
209 analyses revealed that the protein has the hallmark characteristics of a fully functional voltage gated  
210 potassium channel member of the  $K_v12.1$  family[42] in terms of voltage activation characteristics,  
211 time-dependent activation kinetics, potassium selectivity and inhibition by  $Ba^{2+}$  ions (Fig. 5).

212 We found that also *X. montezumae*, which has an even longer sword than *X. hellerii*, has the same high  
213 expression of *kcnh8* in the sword and during sword regeneration (fig. S13). Interestingly, in species  
214 that develops shorter sword than *X.hellerii* or only tiny protrusions swords, *X. monticolus* and *X.*  
215 *pygmaeus*, *kcnh8* expression during sword regeneration is only weakly upregulated. In the swordless  
216 platyfish *X. maculatus*, no differential expression of *kcnh8* was noted between the lower and upper  
217 compartment and during regeneration of the caudal fin (fig. S13).

218

219

## 220 **Discussion**

221 Sexually selected traits are present in many species and a hallmark of sexual dimorphism between  
222 males and females. The evolutionary mechanism driving their origin, maintenance and role in

223 speciation have been widely studied, but today little is known about the proximate causes, i.e. the  
224 genes encoding sexually selected traits and their function in development of the structure, aside a few  
225 examples from *Drosophila* [43, 44]. The sword is a male specific outgrowth of the lower margin of the  
226 caudal fin and we wanted to know what genes provoke its sex-specific elongation. The fins of fish are  
227 intricate three-dimensional structures composed of numerous cell types. Size, shape, pigmentation and  
228 other features of fins are generally highly fixed and specific for different species and certain  
229 ontogenetic stages. In many species fins are sexually dimorphic traits [45]. In zebrafish it has been  
230 shown that pectoral fins have a regionalized gene expression pattern that creates gradients of  
231 transcription factors [34]. We conclude that also in the caudal fin of male swordtails a similar specific  
232 regionalized gene activity pattern provides the positional information for development of the sword.  
233 The regional expression of the transcription factors *Hoxb13a*, *Six2a*, *Tbx3a* and *Pax9* produces a  
234 prepattern in the tail fin that is connected to sword development since the expression pattern vanishes  
235 in species that have secondarily lost the sword. This pattern is established before the sword develops  
236 during puberty and its presence (with minor deviations) in adult females may allow the development  
237 of a sword after experimental androgen treatment or as a natural phenomenon in old post-reproductive  
238 females [46, 47].

239 To identify those genes that are determining the development of the sword in males we reasoned that  
240 such genes should be differentially expressed in sword development and encoded in genomic regions  
241 that are linked to this trait. Our QTL analysis, consistent with earlier genetic findings [41], uncovered  
242 that several chromosomal regions contribute to the polygenic basis of the male structure. Consistently,  
243 the major locus on chromosome 13 fully overlaps a similar broad QTL that was obtained in an  
244 independent study for the character sword length in natural hybrids between a swordless (*X.*  
245 *birchmanni*) and a sworded (*X. malinche*) Northern swordtail species [48]. We identified two  
246 candidate genes that appear to be involved in the development of the sword. Rather than being typical  
247 regulators of development and differentiation such as transcription factors or extracellular diffusible  
248 growth factors, experiments identified a channel protein, *kcnh8*, and a chaperone, *fkpb9*.

249 In zebrafish long fin mutants, mutations in several potassium channel genes, including *kcnh2a*,  
250 *kcnk5b*, and *kcc4a* cause various types of fin overgrowth [49-51]. In fighting fish, *Betta splendens*,  
251 *kcnh8* mis-expression is associated with pectoral fin overgrowth (Wang et al. submitted). A  
252 hyperpolarizing mutation in *kcnk5b* causes the long fin phenotype in ornamental goldfish [52].  
253 Mutations disrupting ion channels and ion-dependent signaling are extensively related to abnormal  
254 organ development and regeneration via bioelectrical regulation [53]. Potassium channels of the *Kcnh*  
255 family have been implicated in cell proliferation by influencing membrane polarization and thus  
256 calcium signaling [54, 55]. Increased intracellular calcium levels activate osteoblasts and their  
257 precursors [56, 57], which build the fin rays of the overgrowing structures of the long-fin mutants and  
258 the *Xiphophorus* sword. Potassium channels can also play a role in cell cycle and proliferation control  
259 by mechanisms unrelated to ion channel permeability [55]. Despite this wide spectrum of biological

260 functions of potassium channels besides the classical channel properties, their transcriptional  
261 regulation and biochemical interactions are not well understood.

262 Voltage gated channels of the EAG family are inhibited by intracellular calcium [58]. One function of  
263 Fkpb9 besides acting as a prolyl cis-trans isomerase is mediated through its calcium binding Ef-H  
264 domain [59]. In zebrafish tailfin growth a predominant role for the calcium activated protein  
265 phosphatase calcineurin was shown. In this case inhibition of this pathway led to unscheduled  
266 outgrowth of the caudal fin margin [60].

267 *Kcnh8* is the pore forming unit of some voltage-gated potassium channels, which have broad functions  
268 mainly in neurotransmitter release and neuronal excitability, but also in epithelial electrolyte transport  
269 and cell volume regulation [55, 61]. In zebrafish, due to the presence of duplicate versions of the  
270 channel protein coding genes, one paralog obviously can fulfill functions restricted to the fin.  
271 Mutations of the “fin” paralog only affect fin growth, while the other channel functions are executed  
272 by the second paralog. However, *kcnh8* is present only as a single copy and it is abundantly expressed  
273 in the brain and to a lesser extent in the gonads of both sexes and additionally only in the male sword  
274 of *Xiphophorus* but importantly not in the corresponding part of the female caudal fin. These  
275 expression domains imply that a neuronal gene was recruited during the evolution of the male  
276 ornament about 3-5 million years ago, early during the diversification of swordtail fish through a  
277 rewiring of its regulatory network rather than by selection on its protein function. The *Kcnh8* proteins  
278 of *Xiphophorus* species have a few aminoacid changes, which, however, do not correlate with the  
279 presence or absence of a sword in males (fig. S14). Thus, it is more likely that the function for sword  
280 development has been added to the *kcnh8* gene through changes in gene regulation.

281 The implication of *Kcnh8* activity in natural sword development adds a case of an evolutionary mutant  
282 for a potassium channel being involved in regulation of fin growth, which thus far were only seen in  
283 laboratory mutants. It appears that the four genes, *kcnh2a*, *kcnk5b*, *kcc4b* and *kcnh8*, govern a  
284 common pathway of downstream signaling that connects membrane potential, K<sup>+</sup>  
285 permeability, eilennummern and calcium homeostasis to the ubiquitous machinery of cell growth and  
286 proliferation. Although swordtails, because of their livebearing mode of reproduction are not  
287 amenable to transgenic technologies, the induced fin mutants of egg laying fish can be employed to  
288 systematically knock-out candidate signal transducers and elucidate the interface between ion channels  
289 and growth control.

## 290 **Acknowledgements**

291 This work was supported by the Deutsche Forschungsgemeinschaft (grants 5263398, 163418330 and  
292 5446040 to AM and by NIH grant 5R01OD011116 (JHP), 5R24OD018555 (JHP, MS, RW, WW).

293

294



295

296

### 297 **Authors contributions**

298 MS, AM and JHP conceived the study and coordinated the work. JA, AA, JC, JW and JHP  
299 did the QTL mapping, JO and CS prepared RNA and performed the qRT-PCR experiments,  
300 DG and RH characterized the channel properties of *Xiphophorus Kcnh8*, SS and CW  
301 analyzed sword growth and regeneration, SK, DK and MGO analyzed the RNA-seq data and  
302 intersected the expression with the QTL data, AM contributed RNA-seq data from androgen  
303 induced swords, WCW and RW contributed the *Xiphophorus hellerii* genome, MS analyzed  
304 all data and drafted the manuscript, all authors were involved in preparing the final version of  
305 the manuscript.

### 306 **Competing interests**

307 All authors declare no competing interests.

308

309 .

310

311

- 312 1. Darwin, C., *The Descent of Man and Selection in Relation to Sex*. 1871, London: John  
313 Murray.
- 314 2. Eibner, C., et al., *An organizer controls the development of the "sword," a sexually*  
315 *selected trait in swordtail fish*. *Evol Dev*, 2008. **10**(4): p. 403-12.
- 316 3. Kang, J.H., et al., *Transcriptomics of two evolutionary novelties: how to make a*  
317 *sperm-transfer organ out of an anal fin and a sexually selected "sword" out of a*  
318 *caudal fin*. *Ecol Evol*, 2015. **5**(4): p. 848-64.
- 319 4. Dzwillo, M., *Sekundäre Geschlechtsmerkmale an der Caudalflosse einiger*  
320 *Xiphophorini unter dem Einfluß von Methyltestosteron*. *Mitt. Hamburg. Zool. Mus.*  
321 *Inst*, 1964(61): p. 15-22.
- 322 5. Basolo, A.L., *Female preference predates the evolution of the sword in swordtail fish*.  
323 *Science*, 1990. **250**(4982): p. 808-10.
- 324 6. Basolo, A.L., *Evolutionary change in a receiver bias: a comparison of female*  
325 *preference functions*. *Proc Biol Sci*, 1998. **265**(1411): p. 2223-8.
- 326 7. Fisher, R.A., *The Genetical Theory of Natural Selection*. 1930, Oxford: Oxford  
327 University Press.
- 328 8. Meyer, A., J.M. Morrissey, and M. Schartl, *Recurrent origin of a sexually selected*  
329 *trait in Xiphophorus fishes inferred from a molecular phylogeny*. *Nature*, 1994.  
330 **368**(6471): p. 539-42.
- 331 9. Wagner, W.E., Jr., et al., *Tradeoffs limit the evolution of male traits that are attractive*  
332 *to females*. *Proc Biol Sci*, 2012. **279**(1739): p. 2899-906.
- 333 10. Rosenthal, G.G., et al., *Shared preferences by predators and females for male*  
334 *ornaments in swordtails*. *Am Nat*, 2001. **158**(2): p. 146-54.
- 335 11. Basolo, A.L. and G. Alcaraz, *The turn of the sword: length increases male swimming*  
336 *costs in swordtails*. *Proc Biol Sci*, 2003. **270**(1524): p. 1631-6.
- 337 12. Endler, J.A., *Signals, signal conditions, and the direction of evolution*. *American*  
338 *Naturalist*, 1992. **139**: p. 125-153.

- 339 13. Ryan, M.J., *Sexual selection, sensory systems and sensory exploitation*. Oxford  
340 Surveys in Evolutionary Biology, 1990. **7**: p. 157-195.
- 341 14. Jones, J.C., et al., *The evolutionary history of Xiphophorus fish and their sexually*  
342 *selected sword: a genome-wide approach using restriction site-associated DNA*  
343 *sequencing*. Mol Ecol, 2013. **22**(11): p. 2986-3001.
- 344 15. Cui, R., et al., *Phylogenomics reveals extensive reticulate evolution in Xiphophorus*  
345 *fishes*. Evolution, 2013. **67**(8): p. 2166-79.
- 346 16. Kang, J.H., et al., *Comprehensive phylogenetic analysis of all species of swordtails*  
347 *and platies (Pisces: Genus Xiphophorus) uncovers a hybrid origin of a swordtail fish,*  
348 *Xiphophorus monticolus, and demonstrates that the sexually selected sword*  
349 *originated in the ancestral lineage of the genus, but was lost again secondarily*. BMC  
350 Evol Biol, 2013. **13**: p. 25.
- 351 17. Pomiankowski, A., *Sexual selection. Swordplay and sensory bias*. Nature, 1994.  
352 **368**(6471): p. 494-5.
- 353 18. Da Silva, J., *Male swords and female preferences*. Science, 1991. **253**(5026): p. 1426.
- 354 19. Winkler, S.T., et al., *Male swords and female preferences*. Science, 1991. **253**(5026):  
355 p. 1426.
- 356 20. Endler, J.A. and A.L. Basolo, *Sensory ecology, receiver biases and sexual selection*.  
357 Trends Ecol Evol, 1998. **13**(10): p. 415-20.
- 358 21. Meyer, A., W. Salzburger, and M. Schartl, *Hybrid origin of a swordtail species*  
359 *(Teleostei: Xiphophorus clemenciae) driven by sexual selection*. Mol Ecol, 2006.  
360 **15**(3): p. 721-30.
- 361 22. Wong, B.B. and G.G. Rosenthal, *Female disdain for swords in a swordtail fish*. Am  
362 Nat, 2006. **167**(1): p. 136-40.
- 363 23. Coyne, J.A. and H.A. Orr, *Speciation*. 2004, Sunderland, MA: Sinauer.
- 364 24. Mayr, E., *Animal species and evolution*. 1963, Cambridge, MA: Belknap Press of  
365 Harvard University Press.
- 366 25. Ritchie, M.G., *Sexual selection and speciation*. Annual Review of Ecology, Evolution,  
367 and Systematics, 2007. **38**: p. 79-102.
- 368 26. van Doorn, G.S., P. Edelaar, and F.J. Weissing, *On the origin of species by natural*  
369 *and sexual selection*. Science, 2009. **326**(5960): p. 1704-7.
- 370 27. Tinghitella, R.M., et al., *On the role of male competition in speciation: a review and*  
371 *research agenda*. Behavioral Ecology, 2017. **29**(4): p. 783-797.
- 372 28. Gotoh, H., et al., *The function of appendage patterning genes in mandible*  
373 *development of the sexually dimorphic stag beetle*. Dev Biol, 2017. **422**(1): p. 24-32.
- 374 29. Kraaijeveld, K., *Genetic architecture of novel ornamental traits and the establishment*  
375 *of sexual dimorphism: insights from domestic birds*. Journal of Ornithology, 2019.  
376 **160**(3): p. 861-868.
- 377 30. Zauner, H., et al., *Differential regulation of msx genes in the development of the*  
378 *gonopodium, an intromittent organ, and of the "sword," a sexually selected trait of*  
379 *swordtail fishes (Xiphophorus)*. Evol Dev, 2003. **5**(5): p. 466-77.
- 380 31. Offen, N., et al., *Fgfr1 signalling in the development of a sexually selected trait in*  
381 *vertebrates, the sword of swordtail fish*. BMC Dev Biol, 2008. **8**: p. 98.
- 382 32. Offen, N., A. Meyer, and G. Begemann, *Identification of novel genes involved in the*  
383 *development of the sword and gonopodium in swordtail fish*. Dev Dyn, 2009. **238**(7):  
384 p. 1674-87.
- 385 33. Yamamoto-Shiraishi, Y. and A. Kuroiwa, *Wnt and BMP signaling cooperate with Hox*  
386 *in the control of Six2 expression in limb tendon precursor*. Dev Biol, 2013. **377**(2): p.  
387 363-74.
- 388 34. Nachtrab, G., et al., *Transcriptional components of anteroposterior positional*  
389 *information during zebrafish fin regeneration*. Development, 2013. **140**(18): p. 3754-

- 390 64.
- 391 35. Moriyama, Y., et al., *The medaka zic1/zic4 mutant provides molecular insights into*  
392 *teleost caudal fin evolution*. *Curr Biol*, 2012. **22**(7): p. 601-7.
- 393 36. Corredor-Adamez, M., et al., *Genomic annotation and transcriptome analysis of the*  
394 *zebrafish (Danio rerio) hox complex with description of a novel member, hox b 13a*.  
395 *Evol Dev*, 2005. **7**(5): p. 362-75.
- 396 37. Waghray, A., et al., *Tbx3 Controls Dppa3 Levels and Exit from Pluripotency toward*  
397 *Mesoderm*. *Stem Cell Reports*, 2015. **5**(1): p. 97-110.
- 398 38. Rallis, C., J. Del Buono, and M.P. Logan, *Tbx3 can alter limb position along the*  
399 *rostrocaudal axis of the developing embryo*. *Development*, 2005. **132**(8): p. 1961-70.
- 400 39. Mise, T., et al., *Function of Pax1 and Pax9 in the sclerotome of medaka fish*. *Genesis*,  
401 2008. **46**(4): p. 185-92.
- 402 40. Amores, A., et al., *A RAD-Tag Genetic Map for the Platyfish (Xiphophorus maculatus)*  
403 *Reveals Mechanisms of Karyotype Evolution Among Teleost Fish*. *Genetics*, 2014.  
404 **197**(2): p. 625-641.
- 405 41. Zander, C.D.D., M., *Untersuchungen zur Entwicklung und Vererbung des*  
406 *Caudalfortsatzes der Xiphophorus-Arten(Pisces)*. *Z Wissenschaftliche Zool* 1969. **178**:  
407 p. 267-315.
- 408 42. Zou, A., et al., *Distribution and functional properties of human KCNH8 (Elk1)*  
409 *potassium channels*. *Am J Physiol Cell Physiol*, 2003. **285**(6): p. C1356-66.
- 410 43. Cloud-Richardson, K.M., B.R. Smith, and S.J. Macdonald, *Genetic dissection of*  
411 *intraspecific variation in a male-specific sexual trait in Drosophila melanogaster*.  
412 *Heredity (Edinb)*, 2016. **117**(6): p. 417-426.
- 413 44. Ichimura, K., et al., *Medaka fish, Oryzias latipes, as a model for human obesity-*  
414 *related glomerulopathy*. *Biochem Biophys Res Commun*, 2013. **431**(4): p. 712-7.
- 415 45. Fairbairn, D., *Odd Couples: Extraordinary Differences between the Sexes in the*  
416 *Animal Kingdom*. 2013: Princeton.
- 417 46. Kallman, K.D., *A new look at sex determination in Poeciliid Fishes*, in *Evolutionary*  
418 *Genetics of Fishes*, B.J. Turner, Editor. 1984, Plenum Publishing Corporation. p. 95-  
419 171.
- 420 47. Schartl, M., et al., *A primer of sex determination in poeciliids*, in *Ecology and*  
421 *Evolution of Poeciliid Fishes*, A. Pilastro, J. Evans, and I. Schlupp, Editors. 2010. p.  
422 264-275.
- 423 48. Powell, D.P., C.; Keegan, M.; Banerjee, S.M.; Cui, R.; Andolfatto, P.; Schumer, M.;  
424 Rosenthal, G.G., *The genetic architecture of the sexually selected sword ornament*.  
425 *BioRxiv*, 2020.
- 426 49. Perathoner, S., et al., *Bioelectric signaling regulates size in zebrafish fins*. *PLoS Genet*,  
427 2014. **10**(1): p. e1004080.
- 428 50. Lanni, J.S., et al., *Integrated K<sup>+</sup> channel and K<sup>+</sup>Cl<sup>-</sup> cotransporter functions are*  
429 *required for the coordination of size and proportion during development*. *Dev Biol*,  
430 2019. **456**(2): p. 164-178.
- 431 51. Stewart, S.L.B., H.K.; Yette, G.A.; Henner, A.L.; Braunstein, J.A., Stankunas, K.,  
432 *longfin causes cis-ectopic expression of the kcnh2a ether-a-go-go K<sup>+</sup> channel to*  
433 *autonomously prolong fin outgrowth*. *BioRxiv*, 2019.
- 434 52. Kon, T., et al., *The Genetic Basis of Morphological Diversity in Domesticated*  
435 *Goldfish*. *Curr Biol*, 2020. **30**(12): p. 2260-2274 e6.
- 436 53. McLaughlin, K.A. and M. Levin, *Bioelectric signaling in regeneration: Mechanisms*  
437 *of ionic controls of growth and form*. *Dev Biol*, 2018. **433**(2): p. 177-189.
- 438 54. Sundelacruz, S., M. Levin, and D.L. Kaplan, *Role of membrane potential in the*  
439 *regulation of cell proliferation and differentiation*. *Stem Cell Rev Rep*, 2009. **5**(3): p.  
440 231-46.

- 441 55. Urrego, D., et al., *Potassium channels in cell cycle and cell proliferation*. Philos Trans  
442 R Soc Lond B Biol Sci, 2014. **369**(1638): p. 20130094.  
443 56. Jung, H. and O. Akkus, *Activation of intracellular calcium signaling in osteoblasts*  
444 *colocalizes with the formation of post-yield diffuse microdamage in bone matrix*.  
445 Bonekey Rep, 2016. **5**: p. 778.  
446 57. Goltzman, D. and G.N. Hendy, *The calcium-sensing receptor in bone--mechanistic*  
447 *and therapeutic insights*. Nat Rev Endocrinol, 2015. **11**(5): p. 298-307.  
448 58. Han, B., et al., *Eag1 K(+) Channel: Endogenous Regulation and Functions in*  
449 *Nervous System*. Oxid Med Cell Longev, 2017. **2017**: p. 7371010.  
450 59. Somarelli, J.A., et al., *Structure-based classification of 45 FK506-binding proteins*.  
451 Proteins, 2008. **72**(1): p. 197-208.  
452 60. Kujawski, S., et al., *Calcineurin regulates coordinated outgrowth of zebrafish*  
453 *regenerating fins*. Dev Cell, 2014. **28**(5): p. 573-87.  
454 61. Jan, L.Y. and Y.N. Jan, *Voltage-gated potassium channels and the diversity of*  
455 *electrical signalling*. J Physiol, 2012. **590**(11): p. 2591-9.

456  
457  
458  
459  
460  
461  
462  
463  
464  
465 **Figures**

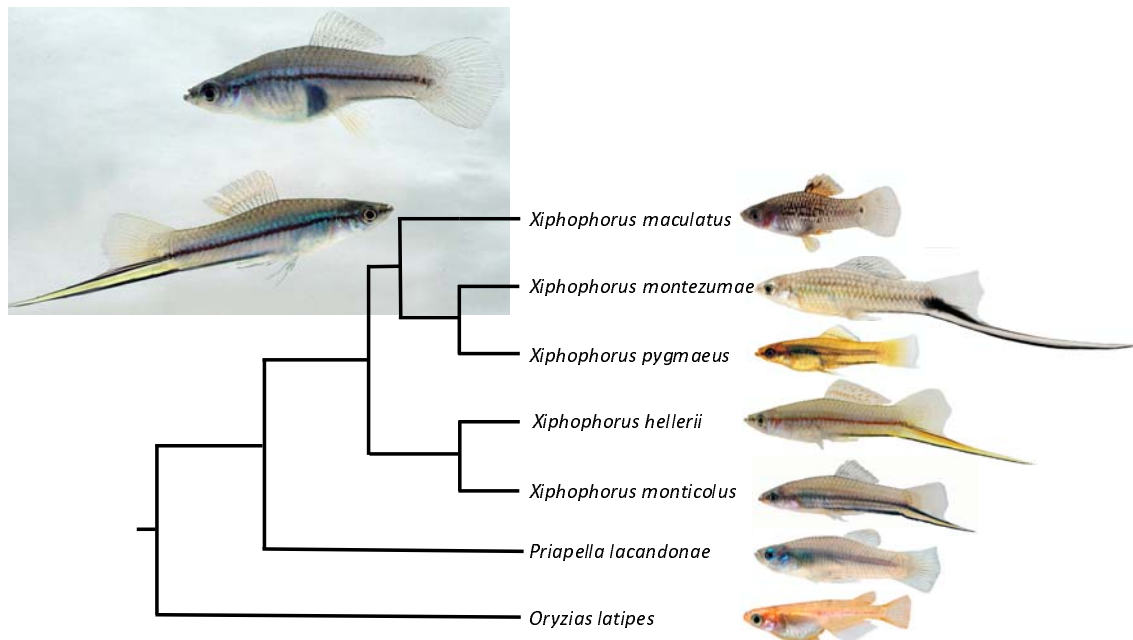

466  
467 **Fig. 1. Phylogenetic relationships of sworded and non-sworded *Xiphophorus* species.** The  
468 swordless *Priapella lacandonae* is the nearest (sister genus) and medaka, *Oryzias latipes*, a distant  
469 outgroup. Insert shows female (upper) and male (lower) of the green swordtail, *Xiphophorus hellerii*.  
470

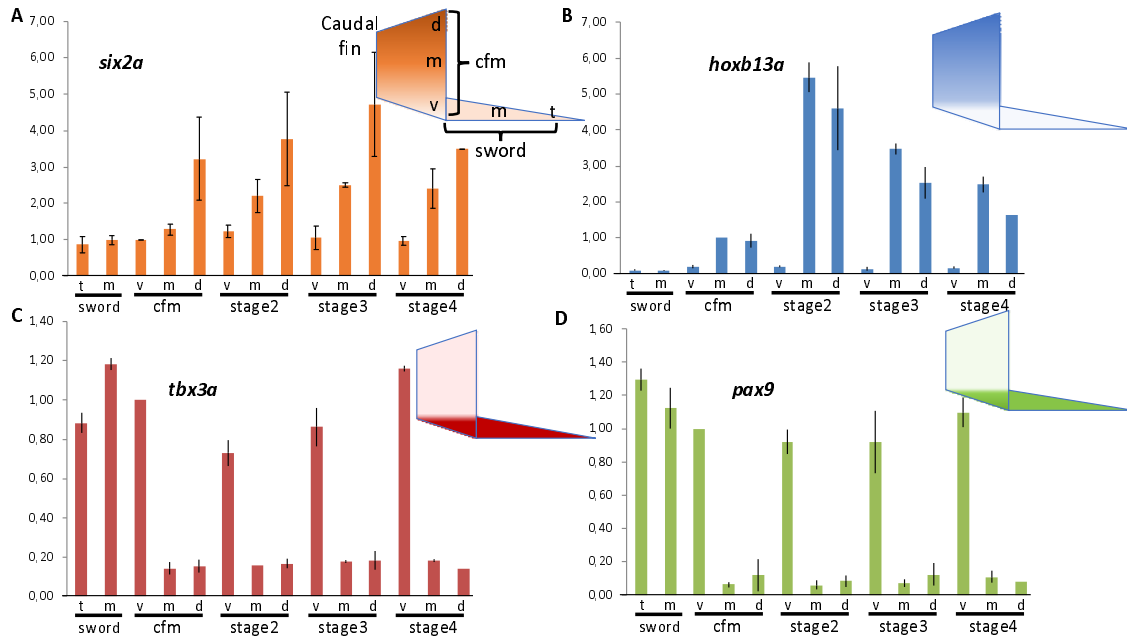

471

472

473 **Fig. 2. Spatial expression pattern of transcription factor genes in the caudal fin and sword of**

474 **male *Xiphophorus hellerii*.** Expression of *six2a* (A), *hoxb13a* (B), *tbx3a* (C) and *pax9* (D) in the

475 caudal fin margin of the tail fin (cfm) of adult *Xiphophorus hellerii* males, the median sector (m) and

476 tip (t) of the sword and during sword regeneration (v, ventral, m, median, d, dorsal compartment).

477 Vertical axis indicates fold change of expression normalized to cvm, v (*six2a*, *tbx3a*, *pax9*) or cvm, m

478 (*hoxb13a*).

479

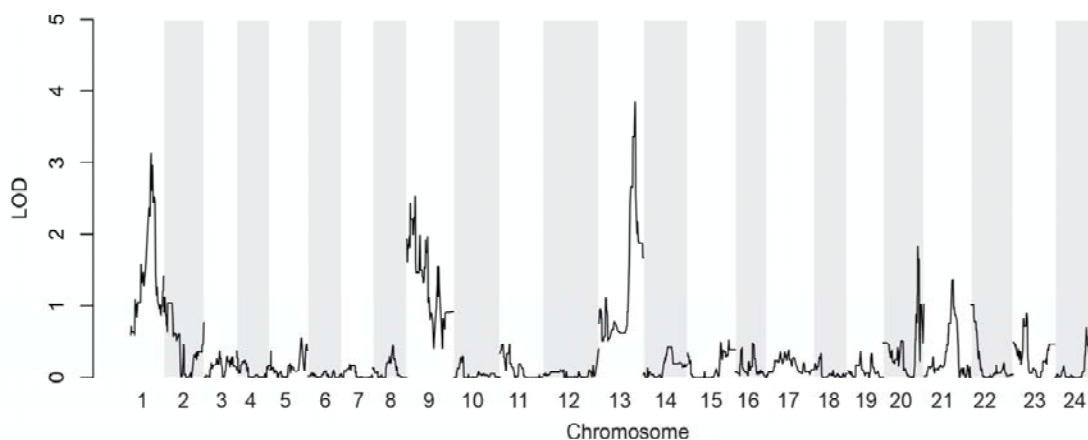

480

481

482

483 smaller peaks on chromosomes 20 – 24. The plot depicts aligned RAD-tag positions on the

484 *Xiphophorus hellerii* genome version 4.1 with maximum likelihood statistics.

485

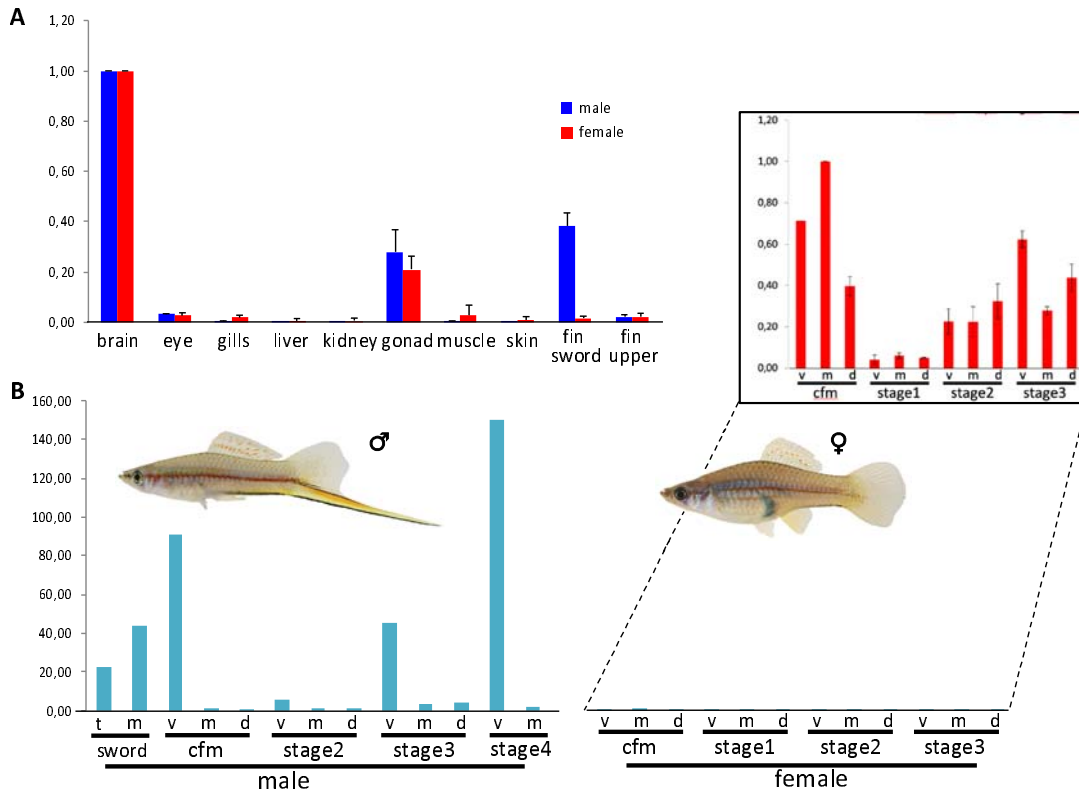

486

487 **Fig. 4. Expression of *kcnh8* in adult males and females of *Xiphophorus hellerii*.** (A) Organ-  
 488 specific expression profile in adult females and males. (B) Expression of *kcnh8* in the caudal fin  
 489 margin of the tail fin (cfm) of adult *Xiphophorus hellerii* males and females, the median sector (m)  
 490 and tip (t) of the sword and during caudal fin regeneration (v, ventral, m, median, d, dorsal  
 491 compartment). Insert: expression in females upscaled. Vertical axis indicates fold change of  
 492 expression normalized to brain (A), cfm, m (B).

493

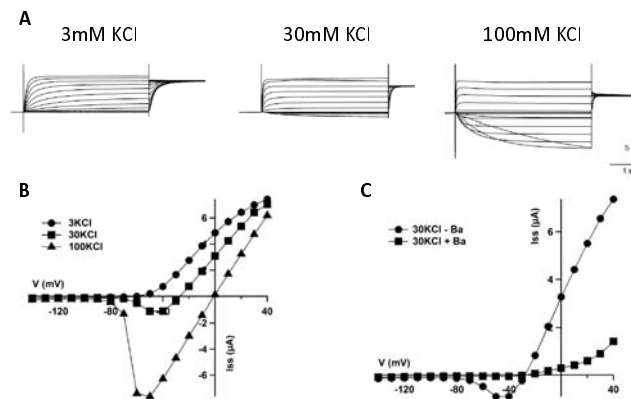

494

495 **Fig. 5. Electrical features of *Xiphophorus hellerii* Kcnh8.** (A) Representative TEVC recordings of  
 496 KCNH8-expressing oocytes at the indicated potassium concentrations. Test voltages ranged between  
 497 +40 to -140 mV in 10 mV decrements. (B) Steady-state currents ( $I_{SS}$ ) extracted from recordings as

498 shown in A) of KCNH8-expressing oocytes were plotted as a function of the applied membrane  
499 potential (mean of  $n = 7$  oocytes  $\pm$  SD of  $\geq 3$  independent experiments). (C) Application of 10 mM  
500 BaCl<sub>2</sub> in the presence of 30 mM KCl inhibited the KCNH8-mediated I<sub>SS</sub> (mean of  $n = 6$  oocytes  $\pm$  SD  
501 of  $\geq 3$  independent experiments).

502

503
